# Supplementary material for: Co-Zeolitic Imidazolate Framework@Cellulose Aerogels from Sugarcane Bagasse for Activating Peroxymonosulfate to Degrade P-Nitrophenol
Source: MDPI journal article supplement (doi:10.3390/polym13050739), 2021-02-27
Supplement: s1 [file s1]

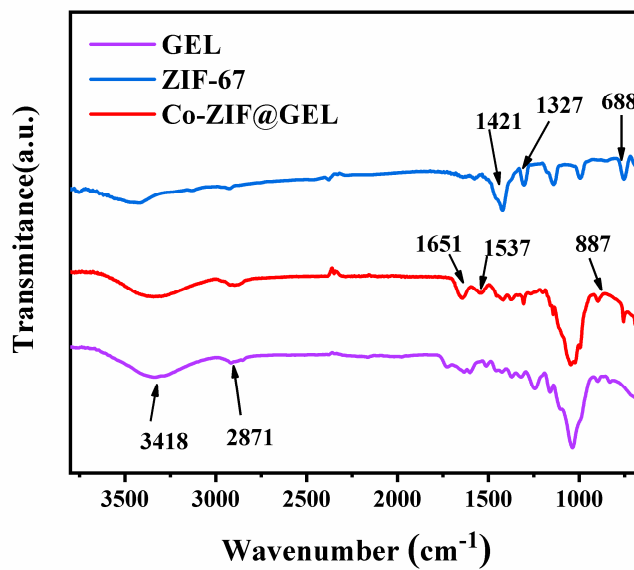

**Figure S1.** FTIR spectra of ZIF-67, Co-ZIF@GEL and cellulose aerogel.

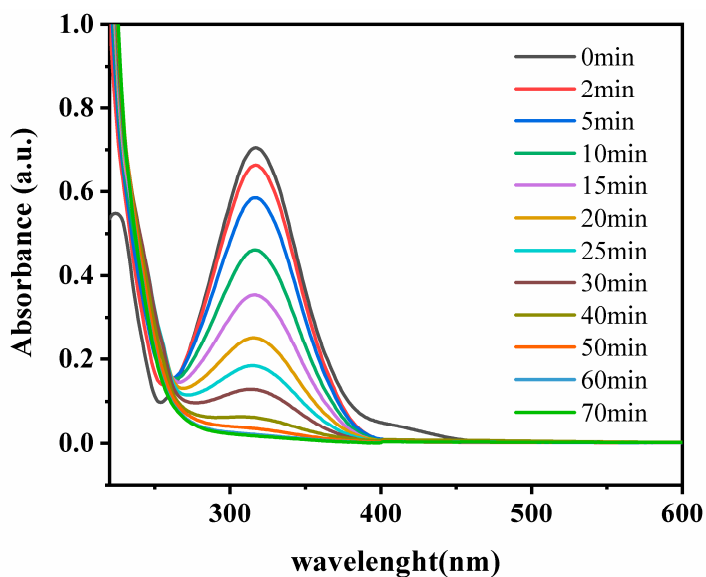

**Figure S2.** Absorption spectra for degradation of PNP in ZIF@GEL/PMS system. (condition: Co-ZIF@GEL= 100 mg/L, PMS=1 mM, PNP=10 mg/L, T=25°C;).
